# Supplementary material
Source: PubMed Central journal article supplement (PMC3160676)

0.1 substitutions/site

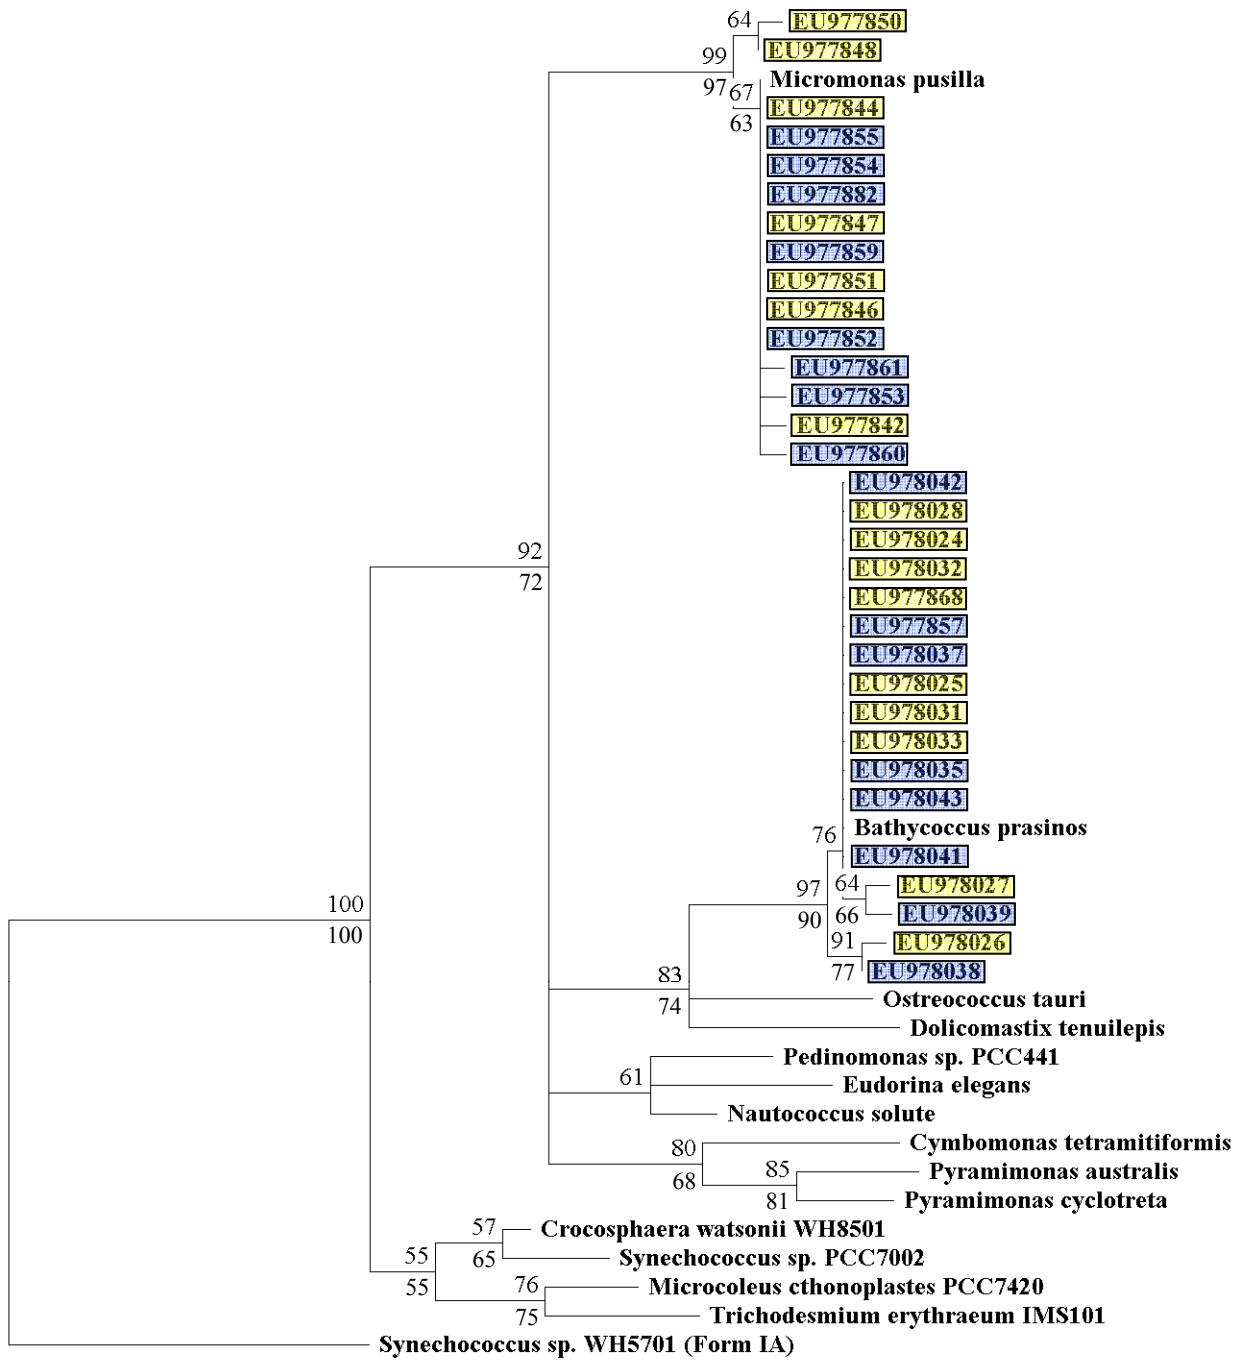

Supplement: ismej201118x1.pdf [file ismej201118x1.pdf]

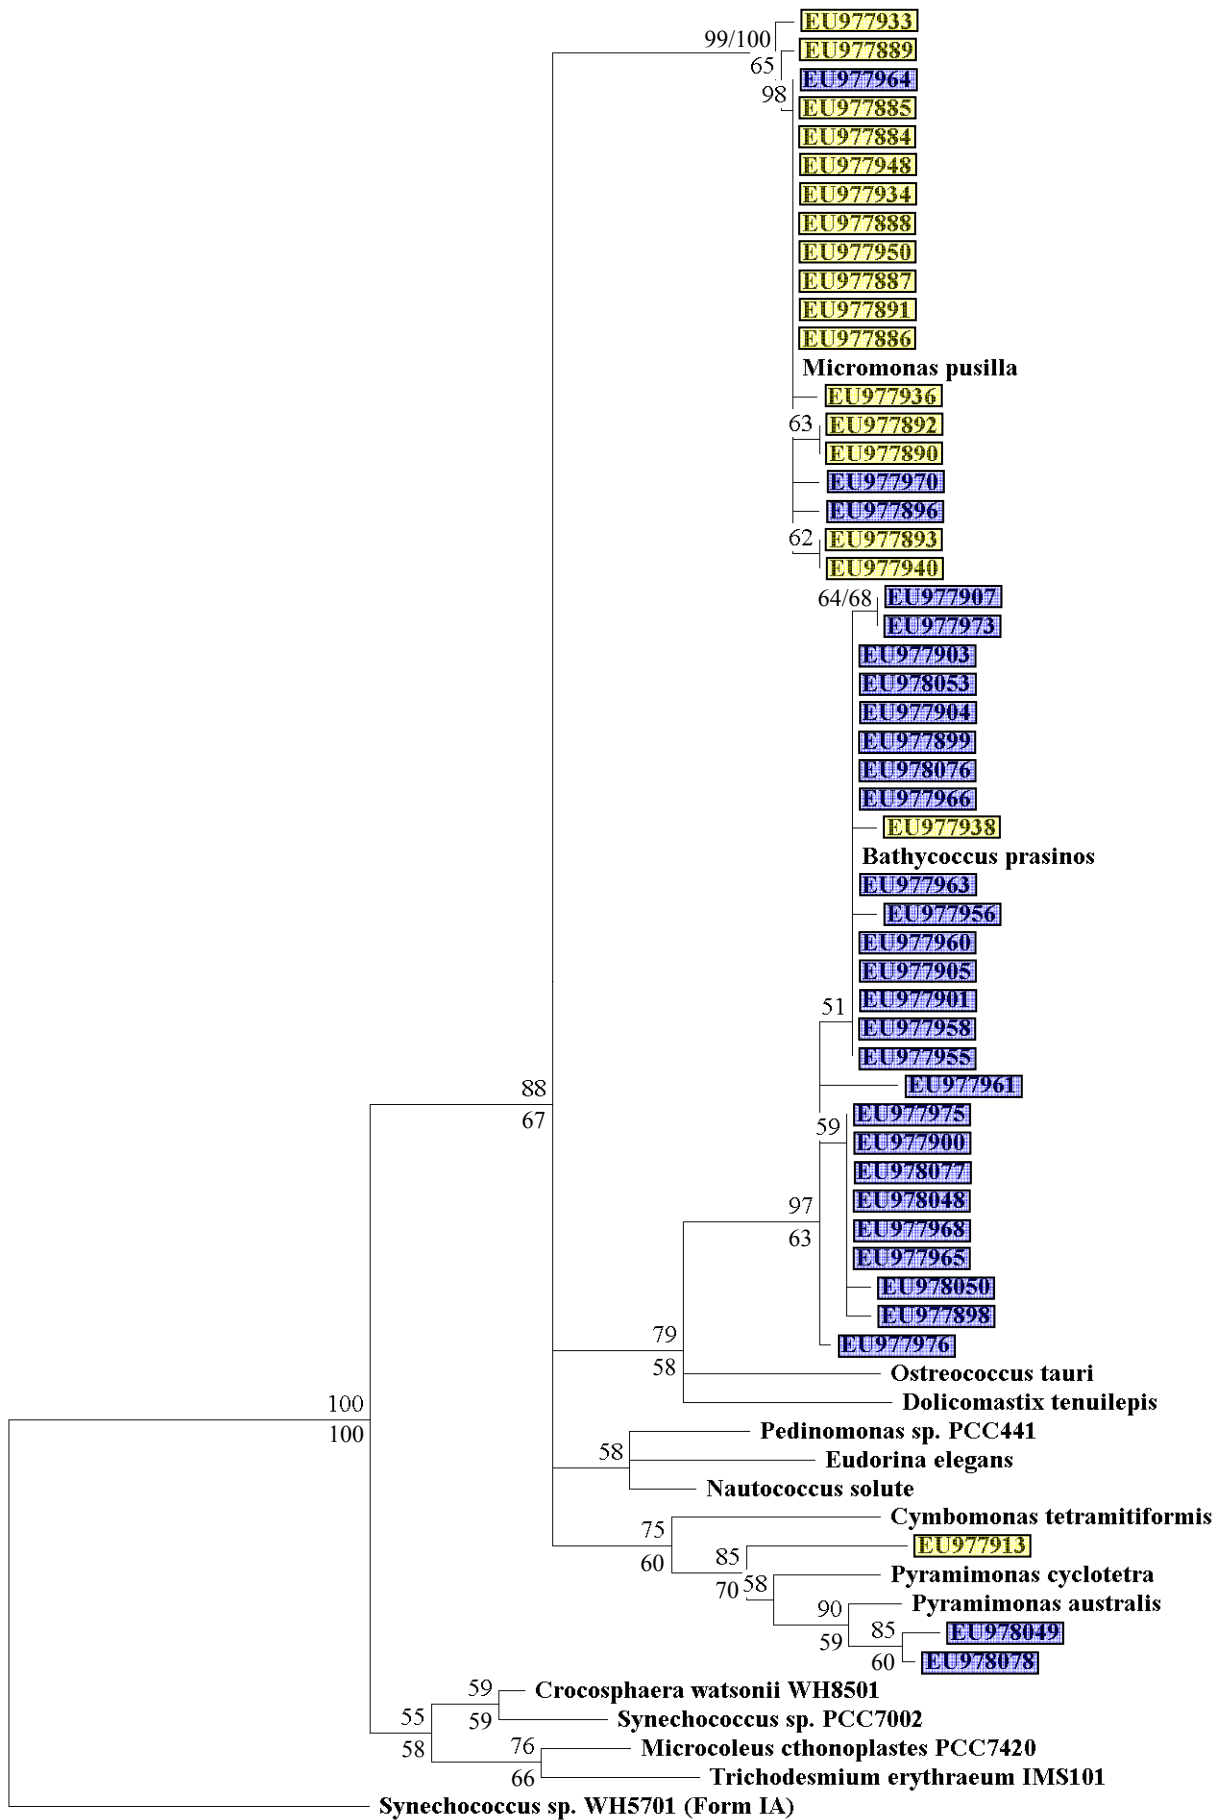

Supplement: ismej201118x2.pdf [file ismej201118x2.pdf]

0.02 substitutions/site

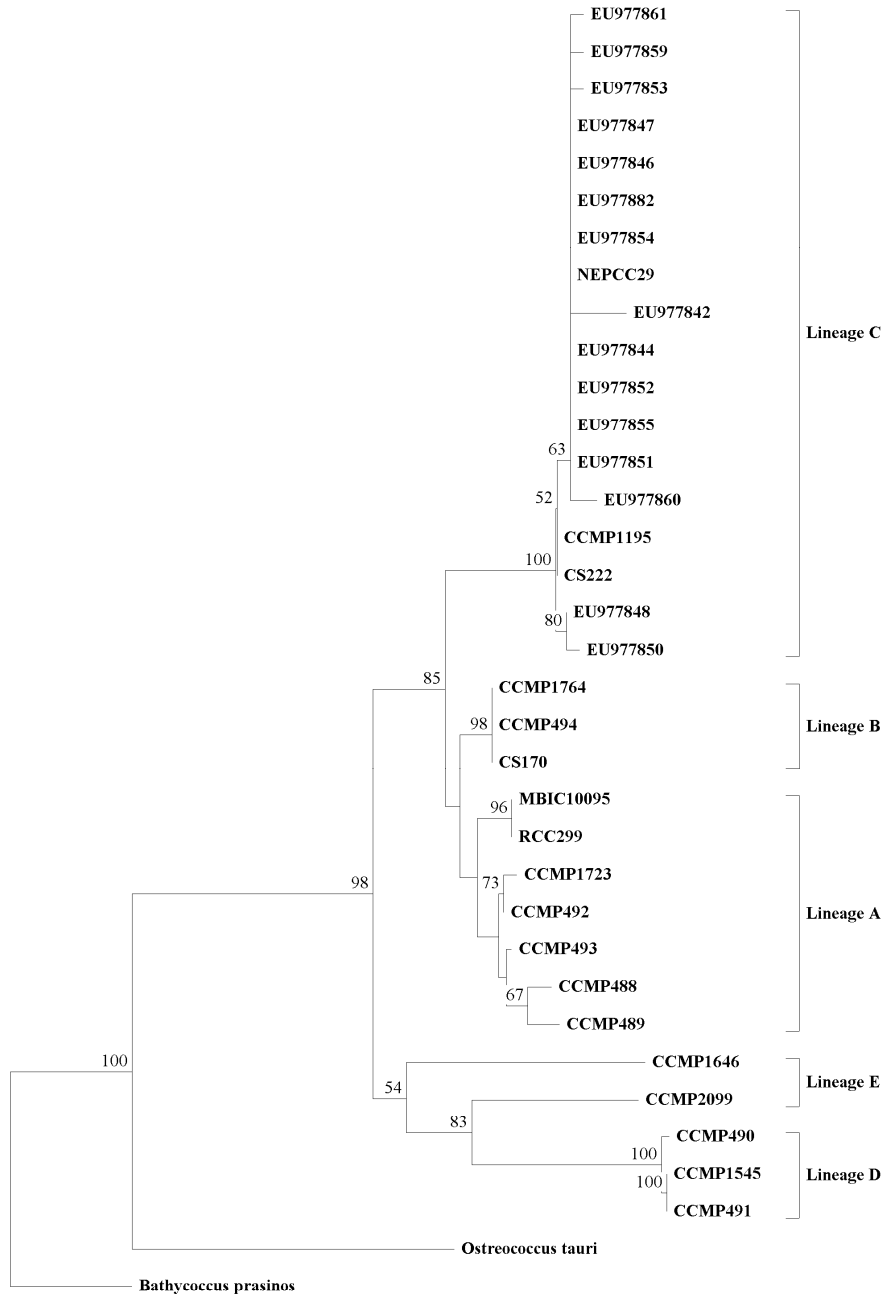

Supplement: ismej201118x3.pdf [file ismej201118x3.pdf]

0.02 substitutions/site

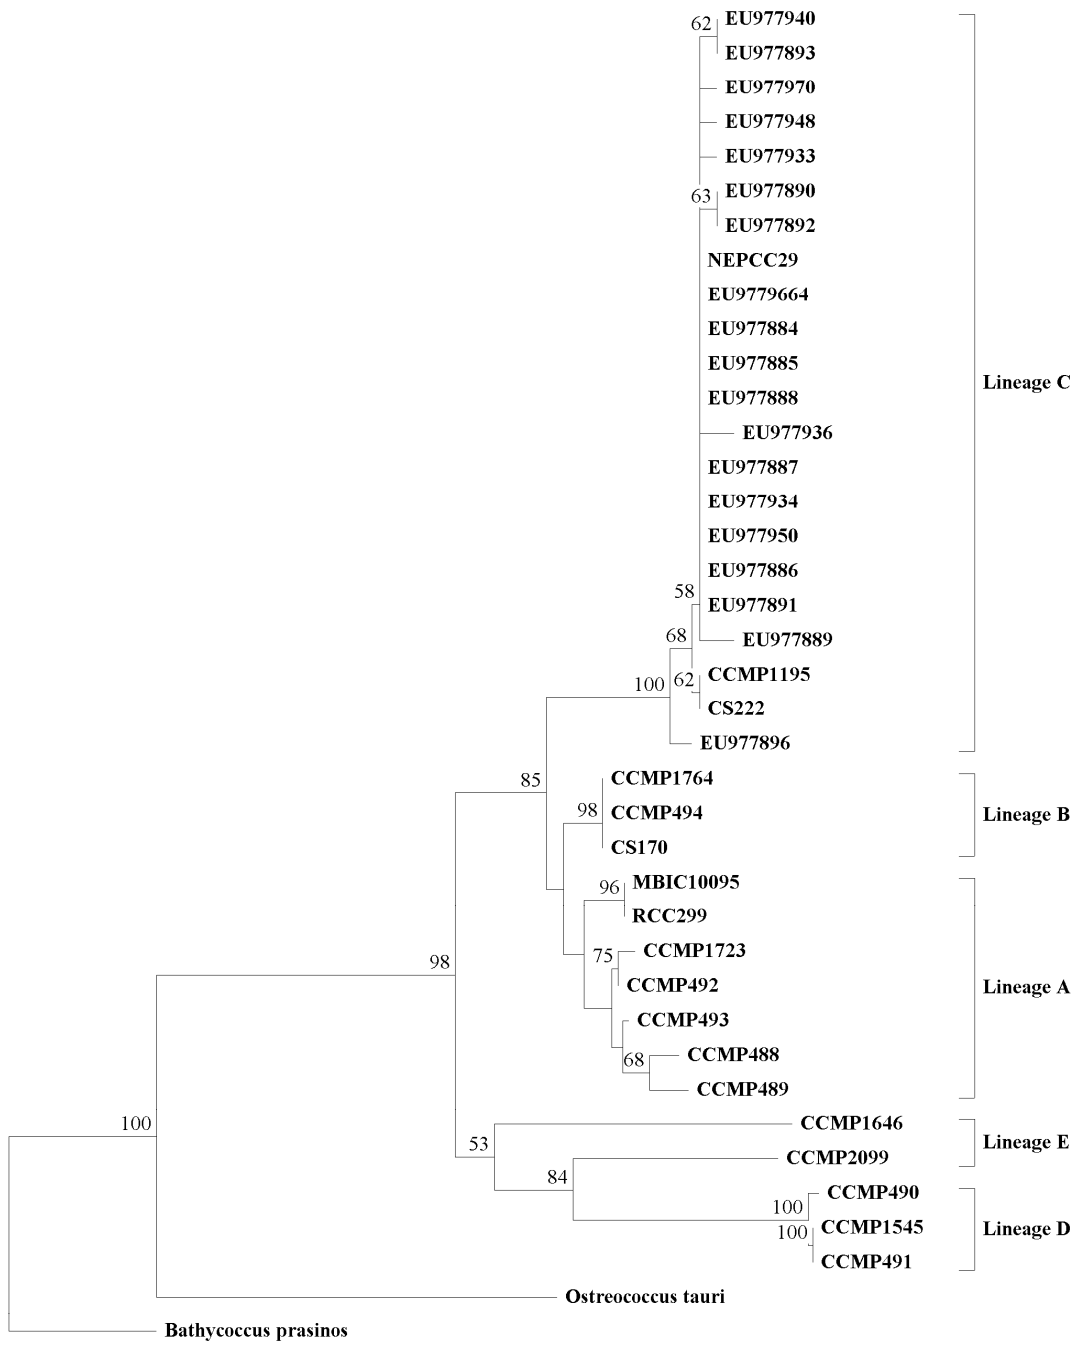

Supplement: ismej201118x4.pdf [file ismej201118x4.pdf]
